# Supplementary material for: Active Ingredients from Euodia ruticarpa Steam Distilled Essential Oil Inhibit PC-3 Prostate Cancer Cell Growth via Direct Action and Indirect Immune Cells Conditioned Media In Vitro
Source: MDPI journal article supplement (doi:10.3390/cimb43020071), 2021-08-28
Supplement: s1 [file s1]

## Supplementary Material

**Figure S1:** UV-visible absorption spectra of ER steam distilled essential oil (SDEO) using a spectrophotometer scanning from 190 nm to 500 nm.

**Figure S2:** ER SDEO chromatograms detected by absorbance at 220 nm (a) and 280 nm (b) using a Sephadex LH-20 gel filtration chromatography.

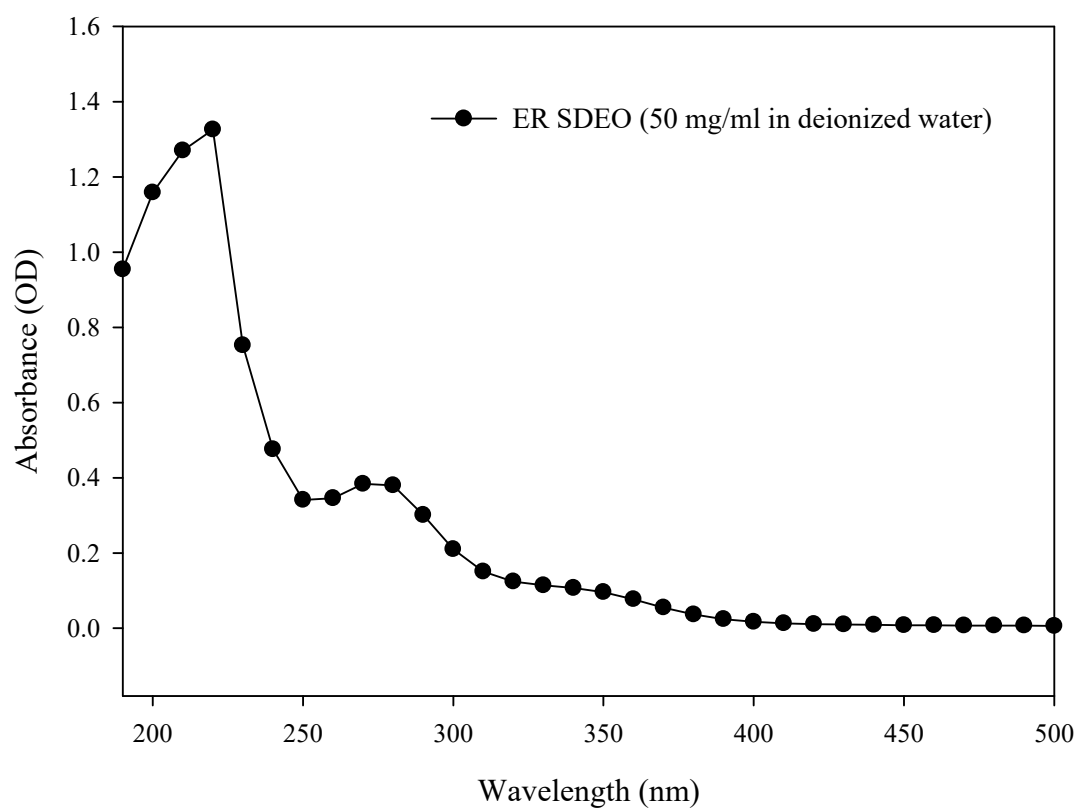

**Figure S1:** UV-visible absorption spectra of ER steam distilled essential oil (SDEO) using a spectrophotometer scanning from 190 nm to 500 nm.

(a)

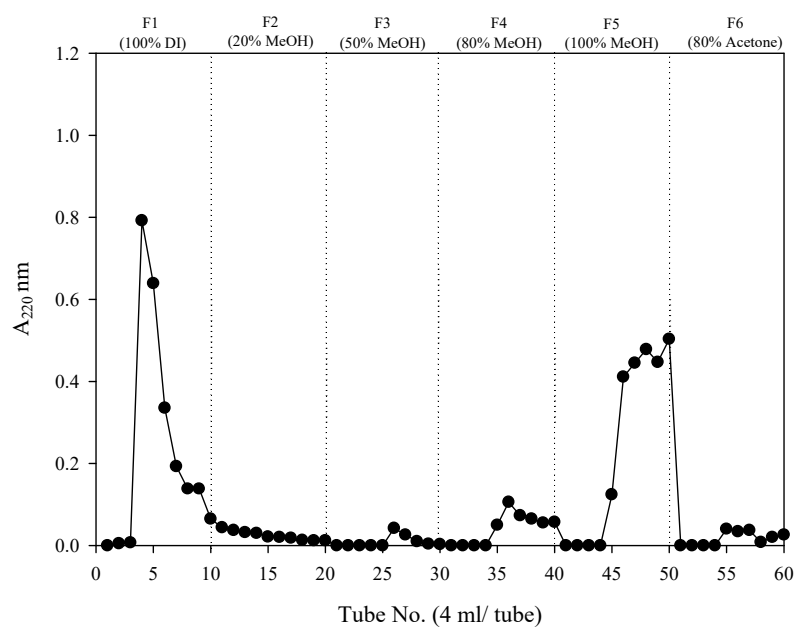

(b)

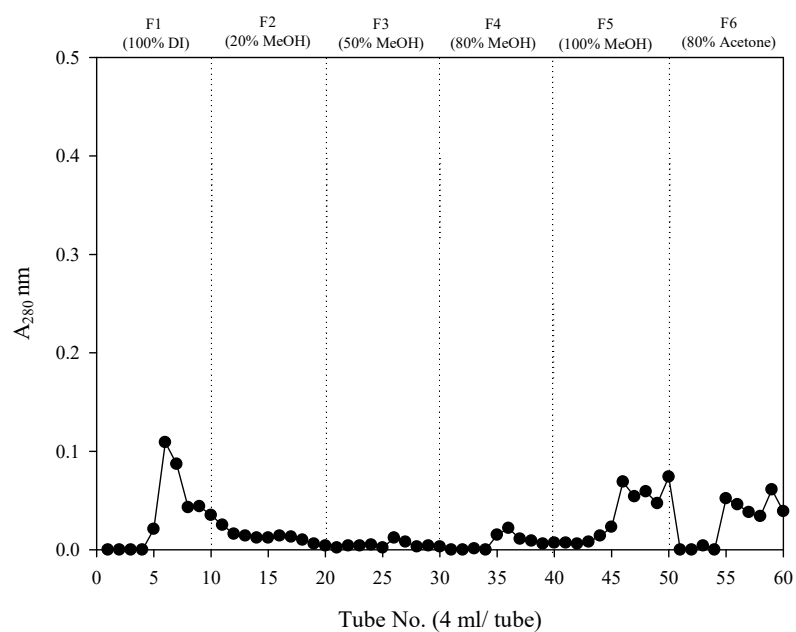

**Figure S2:** ER SDEO chromatograms detected by absorbance at 220 nm (a) and 280 nm (b) using a Sephadex LH-20 gel filtration chromatography.
